# Supplementary material for: Novel cyclen-polyiodide complexes: a reappraisal of I–I covalent and secondary bond limits
Source: Royal Society of Chemistry journal article supplement (doi:10.1039/d2dt00185c), 2022-01-01
Supplement: d2dt00185c1.pdf [file d2dt00185c1.pdf]

Electronic Supplementary Information for:

## **Novel Cyclen-Polyiodide Complexes: A Reappraisal of I-I Covalent and Secondary Bond Limits**

Matteo Savastano, Carla Bazzicalupi, Antonio Bianchi

*Department of Chemistry "Ugo Schiff", Via della Lastruccia 3, 50019 Sesto Fiorentino, Italy*

|                                                                             |       |
|-----------------------------------------------------------------------------|-------|
| <b>Table S1.</b> Crystal data and refinement parameters.....                | S1    |
| <b>Table S2.</b> Relevant distances in <b>1</b> .....                       | S2    |
| <b>Table S3.</b> Relevant distances in <b>2</b> .....                       | S3    |
| <b>Figure S1.</b> Details of I6···I7 and I1···I12 square-like contacts..... | S4    |
| Notes on employed CSD datasets.....                                         | S5-S6 |

**Table S1.** Crystal data and refinement parameters for [(H<sub>2</sub>Cyclen)·(I)·(I<sub>3</sub>)] (**1**) and [(H<sub>2</sub>Cyclen)<sub>2</sub>·(I<sub>5</sub>)·(I<sub>3</sub>)<sub>3</sub>·(I<sub>2</sub>)] (**2**).

|                                        | <b>1</b>                                                     | <b>2</b>                                                       |
|----------------------------------------|--------------------------------------------------------------|----------------------------------------------------------------|
| Empirical formula                      | C <sub>8</sub> H <sub>22</sub> I <sub>4</sub> N <sub>4</sub> | C <sub>16</sub> H <sub>44</sub> I <sub>16</sub> N <sub>8</sub> |
| Formula weight                         | 681.89                                                       | 2378.99                                                        |
| Temperature (K)                        | 100                                                          | 100                                                            |
| space group                            | <i>P2<sub>1</sub>/c</i>                                      | <i>P2<sub>1</sub>/c</i>                                        |
| <i>a</i> (Å)                           | 9.5774(3)                                                    | 16.587(1)                                                      |
| <i>b</i> (Å)                           | 14.6567(5)                                                   | 17.269(2)                                                      |
| <i>c</i> (Å)                           | 13.1889(5)                                                   | 17.219(2)                                                      |
| β (°)                                  | 94.860(1)                                                    | 94.564(3)                                                      |
| Volume (Å <sup>3</sup> )               | 1844.7(1)                                                    | 4916.4(8)                                                      |
| Z                                      | 4                                                            | 4                                                              |
| Independent reflections / R(int)       | 8943/0.0832                                                  | 10080/0.0965                                                   |
| μ (mm <sup>-1</sup> )                  | 6.745 (Mo-Kα)                                                | 10.093 (Mo-Kα)                                                 |
| R indices [ <i>I</i> >2σ( <i>I</i> )]* | R1= 0.0432<br>wR2= 0.0942                                    | R1= 0.0462<br>wR2= 0.0797                                      |
| R indices (all data)*                  | R1= 0.0541<br>wR2= 0.0987                                    | R1= 0.0784<br>wR2= 0.0924                                      |
| CCDC no.                               |                                                              |                                                                |

\*  $R1 = \frac{\sum ||F_o| - |F_c||}{\sum |F_o|}$  ;  $wR2 = \frac{[\sum w(F_o^2 - F_c^2)^2 / \sum wF_o^2]^{1/2}}$

**Table S2.** Relevant distances in **1**. a) I-I bond distances in  $I_3^-$ ; b) list of discussed short contacts in the crystal.

| a)      | Distance (Å) | Symmetry operation |
|---------|--------------|--------------------|
| I1-I2   | 2.9390(4)    |                    |
| I2-I3   | 2.9078(4)    |                    |
| b)      |              |                    |
| I1...N4 | 3.794(3)     |                    |
| I2...C1 | 3.960(4)     | -x+1,-y+1,-z+1     |
| I2...C2 | 3.974(4)     | x+1,-y+1,-z+1      |
| I2...C2 | 3.877(4)     | -x+1,+y-½,-z+½     |
| I3...N2 | 3.803(3)     | -x+1,-y+1,-z+1     |
| I4...N1 | 3.442(3)     |                    |
| I4...N2 | 3.685(3)     | -x+1,-y+1,-z+1     |
| I4...N3 | 3.544(3)     | x+1,+y,+z          |
| I4...N3 | 3.645(3)     | -x+1,-y+1,-z+1     |
| C3...C6 | 3.742(6)     | -x,+y+½,-z+½       |

**Table S3.** Relevant distances in **2**. a) I-I bond distances according to [(H<sub>2</sub>Cyclen)<sub>2</sub>.(I<sub>5</sub>).<sub>3</sub>.(I<sub>2</sub>)] formula, b) list of discussed short contacts in the crystal (shorter to longer order), c) angles in polyiodides according to [(H<sub>2</sub>Cyclen)<sub>2</sub>.(I<sub>5</sub>).<sub>3</sub>.(I<sub>2</sub>)] formula.

| Contact  | Distance (Å) | Symmetry operation                               |
|----------|--------------|--------------------------------------------------|
| a)       |              |                                                  |
| I1-I2    | 2.860(1)     |                                                  |
| I2-I3    | 2.959(1)     |                                                  |
| I4-I5    | 2.946(1)     |                                                  |
| I5-I6    | 2.887(1)     |                                                  |
| I7-I8    | 2.755(1)     |                                                  |
| I9-I10   | 2.980(1)     |                                                  |
| I10-I11  | 2.887(1)     |                                                  |
| I12-I13  | 2.814(1)     |                                                  |
| I13-I14  | 3.097(1)     |                                                  |
| I14-I15  | 3.133(1)     |                                                  |
| I15-I16  | 2.793(1)     |                                                  |
| b)       |              |                                                  |
| I8··I9   | 3.305(1)     |                                                  |
| I6··I7   | 3.483(1)     |                                                  |
| I3··N4   | 3.50(1)      |                                                  |
| C16··C12 | 3.56(2)      | $x, -y + \frac{1}{2} + 1, +z - \frac{1}{2}$      |
| C5··C1   | 3.59(2)      | $x, -y + \frac{1}{2}, +z + \frac{1}{2}$          |
| C1··I6   | 3.73(1)      |                                                  |
| C9··I8   | 3.80(1)      |                                                  |
| I1··I12  | 3.831(1)     | $x, -y + \frac{1}{2} + 1, +z + \frac{1}{2}$      |
| C7··I11  | 3.84(1)      | $x, +y, +z + 1$                                  |
| I4··I16  | 3.856(1)     | $-x + 1, +y - \frac{1}{2}, -z + \frac{1}{2}$     |
| C9··I16  | 3.87(1)      | $x, -y + \frac{1}{2} + 1, +z + \frac{1}{2}$      |
| C13··I10 | 3.88(1)      | $x, -y + \frac{1}{2} + 1, +z + \frac{1}{2}$      |
| I2··I16  | 3.89(1)      | $x, -y + \frac{1}{2} + 1, +z + \frac{1}{2} + 1$  |
| I1··C14  | 3.90(1)      | $-x + 1, +y - \frac{1}{2}, -z + \frac{1}{2} + 1$ |
| I6··I7   | 3.901(1)     | $-x, -y + 1, -z + 1$                             |
| C3··I6   | 3.92(1)      | $-x, +y - \frac{1}{2}, -z + \frac{1}{2} + 1$     |
| I12··I1  | 3.945(1)     | $-x + 1, +y + \frac{1}{2}, -z + \frac{1}{2} + 1$ |
| C4··I15  | 3.95(1)      | $x, +y - 1, +z + 1$                              |
| C7··I3   | 3.96(1)      | $-x, -y + 1, -z + 2$                             |
| I4··C10  | 3.97(1)      | $-x + 1, -y + 1, -z + 1$                         |

|             |            |
|-------------|------------|
| c)          |            |
| I1-I2-I3    | 178.58(4)° |
| I4-I5-I6    | 177.63(4)° |
| I9-I10-I11  | 173.78(3)° |
| I12-I13-I14 | 175.72(4)° |
| I13-I14-I15 | 121.86(4)° |
| I14-I15-I16 | 171.97(4)° |

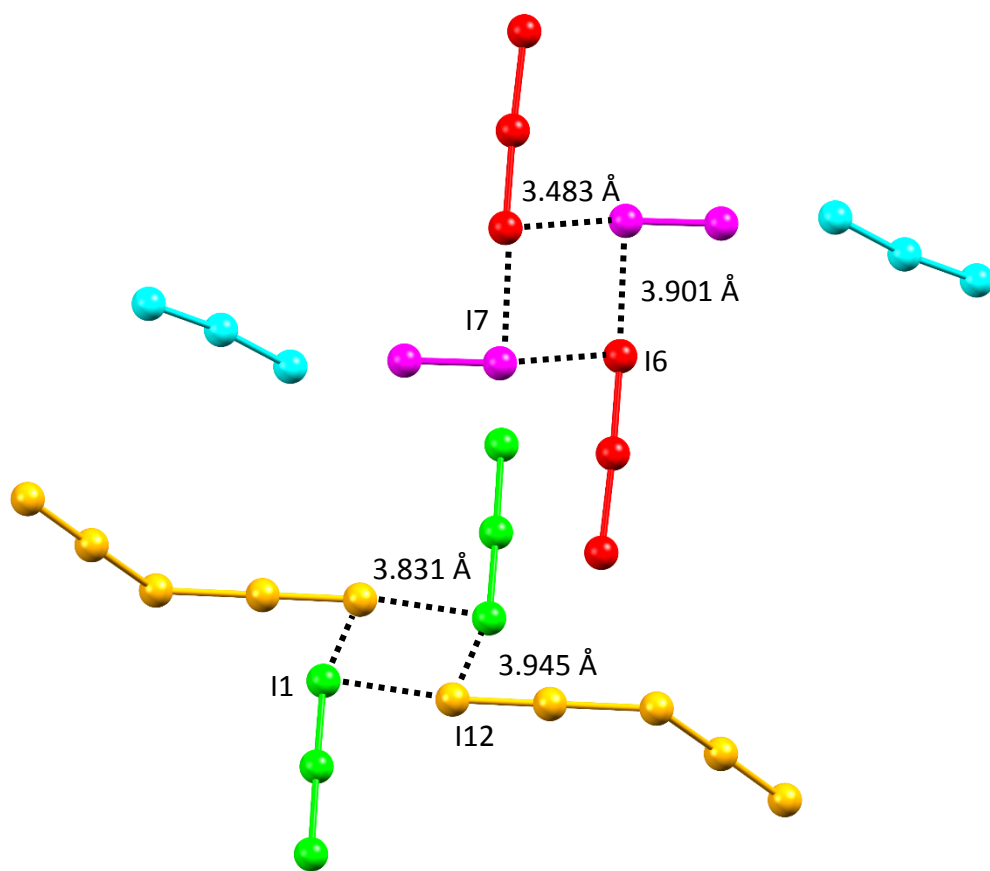

**Figure S1.** Details of I6 $\cdots$ I7 and I1 $\cdots$ I12 square-like contacts.

## Notes on Employed CSD datasets

### General and 1983 overall statistics

A generic I-single bond-I fragment with one of the two I atoms bearing a -1 charge was used to generate a dataset containing polyiodide crystal structures.

Upon it a search for I-I intramolecular distances was performed, specifying 0-4.5 Å range and a minimum and maximum number of covalent bonds in-between considered I atoms of 1 (i.e. direct I-I bonds). This constitutes the covalently bonded I-I fragments shown in the graphs.

A similar search was performed for contacts, i.e. searching on polyiodide dataset for I··I intermolecular contacts between 0 and 4.5 Å distance. This constitutes supramolecular I··I interactions as shown in the graphs.

A sum of covalent and supramolecular subsets was used to illustrate global data.

Searches were paired with a “before 1983” requirement through an AND function to reproduce available data in 1982.

### Dataset for octaiodide, $I_8^{2-}$

Octaiodide search was performed by name (“octaiodide”) to locate such structures where the anion was explicitly stated in the formula, since, when long bonds are involved, searches with fragments drawn as bonded might fail to locate all available material. This resulted in 35 hits, which have been manually discriminated as detailed below. A direct search for an  $I_8$  fragment with 1-2-2-2-2-2-1 number of bonded atoms, corresponding to the most frequent  $I_3^-I_2I_3^-$  isomer, resulted in 28 hits, signifying that our search routine by compound name (35 hits) was mostly effective in gathering available data. A small number of crystal structures (red in the table below) was not comprised in our first search results and was then added. The reason is that some structures have been reported with “octa-iodide” spelling, thus eluding the “octaiodide” search but not the search by connectivity. A last entry, not included in any previous searches, was further included for consistency: DATRIZ01 (blue in the table below). This is because both DATRIZ and DATRIZ02 were located by above mentioned searches. While DATRIZ01 does not state “octaiodide” or “octa-iodide” in the formula, nor it formally contains a “bonded”  $I_8^{2-}$  unit (differently from isostructural DATRIZ and DATRIZ02): it appears as a good case in point about how much an organic revision of threshold bond distances might be required.

| Octaiodide Dataset |                                                               |
|--------------------|---------------------------------------------------------------|
| CSD Refcode        | Notes                                                         |
| AZADPI             |                                                               |
| AZADPI01           |                                                               |
| <b>BASHOS</b>      | Not used; no 3D coordinates available                         |
| BEVLAP             | Not used; no 3D coordinates available                         |
| <b>BUXPUF</b>      | Not used; no 3D coordinates available                         |
| BZHXDA             |                                                               |
| BZHXDB             |                                                               |
| CAZCUE             |                                                               |
| CIMXIH             | Not used; Disordered                                          |
| CIYFOG             |                                                               |
| DATRIZ             | Not used; no 3D coordinates available                         |
| <b>DATRIZ01</b>    |                                                               |
| <b>DATRIZ02</b>    |                                                               |
| <b>DIWQUV</b>      |                                                               |
| DOKBIO             | Not used; it is an octa-iodide (8 I <sup>-</sup> )            |
| FIJWOK             | Not used; no 3D coordinates available                         |
| GIXWIT             |                                                               |
| GUGXAH             |                                                               |
| GUHGOF             |                                                               |
| HIJDUZ             |                                                               |
| HILLOD             |                                                               |
| HIPJAT             | Not used; it is an octa-iodide (8 I <sup>-</sup> )            |
| JOJKID             | Not used; it is an octa-iodide (8 I <sup>-</sup> )            |
| JOPLEH             |                                                               |
| KOSFEF             | Not used; it is an octa-iodide (8 I <sup>-</sup> )            |
| LOBKUI             | Not used; an I <sub>8</sub> unit exists as P-bound moiety     |
| MIWYIA             | Not used; sole example of octaiodide with honeycomb structure |
| NABWUJ             |                                                               |
| PACGOR             |                                                               |
| PECXEB             | Not used; it is an octa-iodide (8 I <sup>-</sup> )            |
| PECXEB01           | Not used; it is an octa-iodide (8 I <sup>-</sup> )            |
| PONPAJ             |                                                               |
| QAQSOQ             | Not used; disordered                                          |
| VAGKOE             |                                                               |
| WEHQOS             | Not used; it is an octa-iodide (8 I <sup>-</sup> )            |
| WITLIU             | Contains 2 different octaiodides                              |
| XAGKAT             |                                                               |
| XEHQIK             |                                                               |
| YUPKEA             |                                                               |
| YUPKIE             |                                                               |
| <b>ZEZDIR</b>      |                                                               |
